# Supplementary material
Source: publisher figshare collection journal article supplement (https://acs.figshare.com/ndownloader/files/10090275)
Supplement: Supplementary file 1 [file 10090275]

Archive with 3 entries (3 files):
- info.xml
- ja7b06022_high_quality.mp4
- ja7b06022.pdf
