# Supplementary material
Source: publisher figshare collection journal article supplement (https://acs.figshare.com/ndownloader/files/10090275)
Supplement: Supplementary file 1 [file 10090275 › info.xml]

<presentation>
	<article>
		<title>Magnetic Field-Activated Sensing of mRNA in Living Cells</title>
		<doi>10.1021/jacs.7b06022</doi>
		<copyright>American Chemical Society</copyright>
		<narrator>Saira Bakshi</narrator>
		<contact>Saira Bakshi, Evgeny Katz</contact>
		<contact-email>bakshisf@clarkson.edu, ekatz@clarkson.edu</contact-email>
		<author-list>
			<author>Sergiy Minko, Dmitry M. Kolpashchikov, Evgeny Katz</author>
		</author-list>
	</article>
	<slides height-width-ratio=".75">
		<slide audio-time="20">
			<subtitle/>
		</slide>
		<slide audio-time="168">
			<subtitle/>
		</slide>
		<slide audio-time="52">
			<subtitle/>
		</slide>
		<slide audio-time="76">
			<subtitle/>
		</slide>
		<slide audio-time="40">
			<subtitle/>
		</slide>
		<slide audio-time="48">
			<subtitle/>
		</slide>
		<slide audio-time="36">
			<subtitle/>
		</slide>
		<slide audio-time="64">
			<subtitle/>
		</slide>
	</slides>
	<audio duration="504"/>
</presentation>
